# Supplementary material for: Oncogenic Role of Long Noncoding RNAMALAT1 in Thyroid Cancer Progression through Regulation of the miR-204/IGF2BP2/m6A-MYC Signaling
Source: PubMed Central journal article supplement — Mol Ther Nucleic Acids. 2020 Sep 26;23:1–12. doi: 10.1016/j.omtn.2020.09.023 (PMC7711188; doi:10.1016/j.omtn.2020.09.023), 2020-09-26
Supplement: mmc1.pdf [file mmc1.pdf]

**OMTN, Volume 23**

**Supplemental Information**

**Oncogenic Role of Long Noncoding RNAMALAT1 in  
Thyroid Cancer Progression through Regulation  
of the miR-204/IGF2BP2/m6A-MYC Signaling**

**Mao Ye, Shu Dong, Haitao Hou, Tao Zhang, and Minghai Shen**

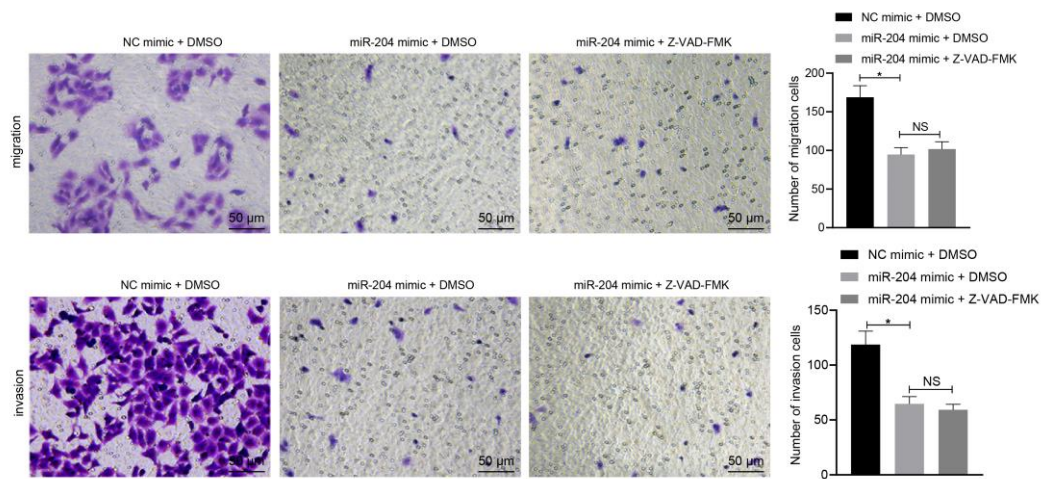

**Figure S1** Apoptosis is not involved in the action of miR-204 on TC cell migration and invasion. Cell migration and invasion measured by Transwell assay ( $\times 200$ ). DMSO and Z-VAD-FMK ( $50 \mu\text{m}$ ) was added and cultured with TC cells for 24 h. Data (mean  $\pm$  standard deviation) were compared with unpaired  $t$  test. The experiment was repeated 3 times independently. \*  $p < 0.05$ .
